# Supplementary material for: Unexpectedly minor nitrous oxide emissions from fluvial networks draining permafrost catchments of the East Qinghai-Tibet Plateau
Source: PubMed Central journal article supplement (PMC8854393; doi:10.1038/s41467-022-28651-8), 2022-02-17
Supplement: 41467_2022_28651_MOESM1_ESM.pdf [file 41467_2022_28651_MOESM1_ESM.pdf]

Supplementary Information for

**Unexpectedly minor nitrous oxide emissions from fluvial networks draining permafrost catchments of the East Qinghai-Tibet Plateau**

Liwei Zhang<sup>1§,†</sup>, Sibozhang<sup>2§</sup>, Xinghui Xia<sup>1\*</sup>, Tom J. Battin<sup>3</sup>, Shaoda Liu<sup>1</sup>, Qingrui Wang<sup>1</sup>, Ran Liu<sup>4</sup>, Zhifeng Yang<sup>2</sup>, Jinren Ni<sup>5</sup> and Emily H. Stanley<sup>6</sup>

<sup>1</sup>Key Laboratory of Water and Sediment Sciences of Ministry of Education & State Key Laboratory of Water Environment Simulation, School of Environment, Beijing Normal University, Beijing, China

<sup>2</sup>Guangdong Provincial Key Laboratory of Water Quality Improvement and Ecological Restoration for Watersheds, Institute of Environmental and Ecological Engineering, Guangdong University of Technology, Guangzhou, China

<sup>3</sup>Stream Biofilm and Ecosystem Research Laboratory, School of Architecture, Civil and Environmental Engineering, École Polytechnique Fédérale de Lausanne, Lausanne, Switzerland

<sup>4</sup>Department of Mathematics, Beijing Jiaotong University, Beijing, China

<sup>5</sup>Key Laboratory of Water and Sediment Sciences of Ministry of Education, College of Environmental Sciences and Engineering, Peking University, Beijing, China

<sup>6</sup>Center for Limnology, University of Wisconsin-Madison, Madison, Wisconsin, USA

<sup>§</sup>Liwei Zhang and Sibozhang contributed equally to this work.

<sup>†</sup>Present address: Sino-French Institute for Earth System Science, College of Urban and Environmental Sciences, Peking University, Beijing, China.

\*To whom correspondence may be addressed. Email: [xiaxh@bnu.edu.cn](mailto:xiaxh@bnu.edu.cn).

## **This file includes:**

### **Supplementary Methods**

1. Dissolved N<sub>2</sub> concentrations.
2. Determination of benthic N<sub>2</sub>O production rates.
3. Sample collection, DNA extraction, and real-time quantitative PCR.

### **Supplementary Discussion**

1. Asynchronous seasonal patterns between concentrations and fluxes.
2. Anthropogenic N inputs on the EQTP.
3. Patterns of gene abundances of (*nirS* + *nirK*) and *nosZ*.
4. Uncertainties.

### **Supplementary Figures**

Fig 1. Names and locations of sampling stations (upper), and total vegetation cover (lower) in the four headwater watersheds of the EQTP, China.

Fig 2. Box plots of seasonal and regional patterns of N<sub>2</sub>O concentrations (a) and fluxes (b) from EQTP rivers.

Fig 3. Photographs of intermediate runoff above the permafrost active layer in the Yangtze River Catchment.

Fig 4. DIN in relation to stream order across EQTP rivers.

Fig 5. Relationship between N<sub>2</sub>O saturation and fluxes.

Fig 6. Relationships between dissolved oxygen saturation (%O<sub>2</sub>) and gene abundances of (*nirS* + *nirK*) and *nosZ*.

### **Supplementary Tables**

Table 1. Summary information on sampling sites.

Table 2. Characteristics of the headwater catchments on the EQTP.

Table 3. N<sub>2</sub>O data for EQTP rivers and other lotic systems worldwide.

Table 4. Simple linear regression of N<sub>2</sub>O concentration as functions of environmental variables.

Table 5. N<sub>2</sub>O yields in EQTP rivers and existing reports for other lotic settings.

Table 6. Laboratory-measurement of benthic N<sub>2</sub>O production rates by Yellow River sediments compared to measured field (*in situ*) fluxes and the estimated contribution of benthic fluxes to total N<sub>2</sub>O emissions.

Table 7. Summary of *nir* and *nosZ* gene abundances for EQTP riverbed sediments and other lotic systems worldwide.

Table 8. The results of stepwise selection of predictive variables in multiple linear regression with N<sub>2</sub>O flux.

Table 9. N<sub>2</sub>O emissions in per unit stream/river surface area and basin area from EQTP waterways and other lotic settings worldwide.

Table 10. Primer pairs used in this study and corresponding amplification protocols.

### **Supplementary References**

## Supplementary Methods

**1. Dissolved N<sub>2</sub> concentrations.** Triplicate samples for dissolved N<sub>2</sub> were collected from surface water by completely filling 12 mL glass vials (Labco Exetainer®) at wrist depth below water surface at each site, then preserved by adding 100 µL saturated ZnCl<sub>2</sub> and stored at ambient temperature in the dark. Dissolved N<sub>2</sub> concentrations were analyzed with a membrane inlet mass spectrometer (MIMS; PrismaPlus®, Pfeiffer Vacuum)<sup>1,2</sup>. In brief, we measured ratios of N<sub>2</sub>/Ar concentration using MIMS, then calculated Ar concentrations at *in situ* water temperature, pressure, and salinity<sup>3</sup>. Finally, dissolved N<sub>2</sub> concentrations were obtained by multiplying N<sub>2</sub>/Ar with calculated Ar concentrations. The excess N<sub>2</sub> concentration ( $\Delta N_2$ ) was then calculated as:  $\Delta N_2 = [N_2]_{\text{measured}} - [N_2]_{\text{eq}}$ .

**2. Determination of benthic N<sub>2</sub>O production rates.** In September 2018, nine sediment samples were collected in the Yellow River for sedimentary N<sub>2</sub>O production rate determination. Briefly, approximately 10 g homogenized sediment samples were placed into 60 mL glass vials, and the remaining volume was filled with overlying water from the collection location. Before being transferred into glass vials, overlying water samples were adjusted to allow DO concentration in the laboratory to match field concentrations as closely as possible<sup>4</sup>. Vials were subsequently capped with silicone rubber septa and crimp-sealed with an aluminum closure then incubated at *in situ* temperature in the dark. The incubation vials were sacrificially sampled by injecting 300 µL of a saturated ZnCl<sub>2</sub> solution at 0, 4, 6, 10, and 18 h. At least four incubations were conducted for each specific sampling point, one of which was used to quantify changes in DO concentration, and the remaining replicates were used for N<sub>2</sub>O analysis. N<sub>2</sub>O concentrations in the glass vials were determined using the headspace equilibrium technique<sup>5</sup> on a GC-µECD. N<sub>2</sub>O production rates were determined based on the linear increase of N<sub>2</sub>O concentrations in the glass vials. Within the sampling period used for the N<sub>2</sub>O production rate calculation, DO variation did not exceed 30% of its original concentration and final DO concentrations were consistently higher than 3.5 mg L<sup>-1</sup>.

**3. Sample collection, DNA extraction, and real-time quantitative PCR.** A total of 26 riverbed sediment samples collected across the four rivers from 2016 to 2018 were prepared in triplicate. These samples were transported to the laboratory at -20 °C in a vehicle freezer prior to being stored at -80 °C in the laboratory. Genomic DNA was extracted from approximately 0.5 g fresh homogenized sediment using the FastDNA® SPIN Kit for Soil (MP Biomedicals, USA) following the manufacturer's instructions; DNA extraction for each sample was performed in triplicate.

Real-time quantitative PCR (qPCR) was employed to estimate the abundances of dissimilatory nitrite reductase (*nirS* and *nirK*)<sup>6</sup> and clade I and II nitrous oxide reductase (*nosZ*) genes<sup>7</sup> in riverbed sediments. The *nirS* and *nirK* genes were amplified using currently available primer pair sets of cd3aF/R3cd and F1aCu/R3Cu, respectively<sup>8</sup>. Primer sets of nosZ2F/nosZ2R<sup>9</sup> and nosZ<sub>II</sub>-F/nosZ<sub>II</sub>-R<sup>10</sup>, which encompass the known diversity of the *nosZ* gene, were used to quantify the nosZ<sub>I</sub> and nosZ<sub>II</sub> gene abundances. The 25 µL qPCR reaction mixtures consisted of 12.5 µL SYBR® Premix Ex Taq™ II (TaKaRa, Japan), 0.2 µL Bovine Serum Albumin (TaKaRa), 0.5 µL of each primer (5 µM), and 2 µL DNA template (~30–50 ng). All amplifications were performed in triplicate on a C1000™ Thermal Cycler (BioRad, CA, USA) according to the protocols described in [Supplementary Table 10](#). The 10-fold serial dilutions of plasmid DNA containing cloned fragments of targeted genes were used to construct standard curves. Negative controls without DNA template were added to check potential DNA contamination. PCR amplification efficiencies for *nirS*, *nirK*, *nosZ*<sub>I</sub> and *nosZ*<sub>II</sub> genes all were higher than 85%, 90%, 86%, and 69%, respectively, with R<sup>2</sup> greater than 0.95 for each gene.

## Supplementary Discussion

### 1. Asynchronous seasonal patterns between concentrations and fluxes.

The highest N<sub>2</sub>O concentration occurred in spring, while the highest diffusive N<sub>2</sub>O flux occurred in summer (Supplementary Fig. 2). This phenomenon is likely the result of temperature-driven differences in gas solubility. Cooler temperatures in the spring (ice-out season) led higher gas solubility and thus greater N<sub>2</sub>O retention in the water column. In contrast, N<sub>2</sub>O solubility was lower in warmer waters in summer. Once sediments are warmed and become saturated with N<sub>2</sub>O, any additional N<sub>2</sub>O delivered to and/or produced in channels readily escapes to the atmosphere. Lower N<sub>2</sub>O concentration in summer may also be attributed to dilution due to seasonal maxima in precipitation (Supplementary Table 2), increased gas exchange, and reduced sediment-water contact.

In addition, a small number of our flux measurements were negative (i.e., N<sub>2</sub>O entering the water from the atmosphere), yet all N<sub>2</sub>O concentrations were supersaturated (Supplementary Fig. 5). The possible explanation may be that measured N<sub>2</sub>O reflect transient concentrations, but N<sub>2</sub>O consumption through complete denitrification may occur during 60-min floating chamber deployments. This hypothesis is consistent with results of low N<sub>2</sub>O yield, small ratio of *nir/nos*, and laboratory benthic production rates.

### 2. Anthropogenic N inputs on the QTP.

Tibetan nomadic herdsman have been active on the QTP for thousands of years, so livestock grazing is the most important anthropogenic influence on the plateau's biogeochemical cycles<sup>11</sup>. But human population densities are low at higher altitudes (Supplementary Table 2), because of the harsh environmental stressors that are distinct from lowlands<sup>12</sup>. Likewise, domestic livestock (yaks and sheep) are bred in lower altitude basins, whereas wild animals (Tibetan antelopes, Tibetan gazelles, kiangs, and wild yaks) are distributed at higher altitudes. There is a strong negative correlation between distribution of livestock and wild animals, illustrating that their habitats rarely overlap due to the competition for forage resources<sup>13</sup>. Based on human population density in each catchment

(Supplementary Table 2), we deduce that manure N in the Yangtze and Upper Yellow Catchments was mainly derived from wild animals (natural sources); manure N in the Nu and Lancang Catchments came from both wild animals and domestic livestock (mixed sources); manure N in the Lower Yellow Catchment originated from livestock and belonged to anthropogenic sources.

The DIN pool in EQTP rivers is dominated by  $\text{NO}_3^-$  (represent an average of 86% of DIN), and anthropogenic  $\text{NO}_3^-$  inputs to aquatic systems on the QTP are derived from human sewage, livestock manure, and synthetic fertilizers. Among these sources, livestock manure N is currently the largest input to EQTP waterways. However, manure largely represents internal source of N in the alpine grassland systems, as it originates from plant N uptake from soils. Stable isotopes of  $\text{NO}_3^-$  ( $\delta^{15}\text{N}$ ,  $\Delta^{17}\text{O}$  and  $\delta^{18}\text{O}$ ) combined with the above deduction indicate that sites underlain by continuous permafrost in the Yangtze Catchment receive substantial natural  $\text{NO}_3^-$  inputs from permafrost soils ( $47.1 \pm 1.2\%$ ), wild animal manure ( $33.4 \pm 3.3\%$ ), and atmospheric precipitation ( $18.5 \pm 1.3\%$ ), but little anthropogenic  $\text{NO}_3^-$  input from sewage ( $1.0 \pm 0.8\%$ ) and none from livestock manure or fertilizers<sup>14</sup>. By comparison, anthropogenic  $\text{NO}_3^-$  inputs from livestock manure ( $34.9 \pm 10.0\%$ ), sewage ( $5.6 \pm 2.3\%$ ), and fertilizers ( $14.9 \pm 5.4\%$ ) became dominant in the Lancang (site LTJ) and Lower Yellow Rivers in non-continuous permafrost zone, and the contribution of natural  $\text{NO}_3^-$  inputs [permafrost soils ( $37.7 \pm 3.9\%$ ) and atmospheric precipitation ( $6.9 \pm 1.6\%$ )] were reduced accordingly<sup>14,15</sup>. Above all, both natural and anthropogenic N can be taken up by plants, thus a part of terrestrial N can be sequestered before entering rivers.

### **3. Patterns of gene abundances of (*nirS* + *nirK*) and *nosZ*.**

The relationship in Supplementary Fig. 6 was driven by a decline in gene abundances of *nir* genes when  $\% \text{O}_2 > 110\%$ , while *nos* gene abundances were not apparently responsive to the degree of  $\% \text{O}_2$ . When  $\% \text{O}_2 \geq 100\%$ , *nos* of some denitrifiers is still functional at the transcriptional and metabolic levels, albeit at low rates, and may even have a higher tolerance to oxygen than *nir*<sup>16,17</sup>.

#### 4. Uncertainties.

Upscaling N<sub>2</sub>O emissions from headwater streams is a challenging task because the contribution of 1<sup>st</sup>- and 2<sup>nd</sup>- order streams to total efflux incorporates uncertainties in both gas fluxes and surface area. To reduce the uncertainty associated with the estimate of the total surface area of 1<sup>st</sup>- and 2<sup>nd</sup>- order streams, we surveyed river width in the headwater fluvial networks from 3<sup>rd</sup>- to 7<sup>th</sup>- order across the EQTP in combination with extracting 50 width measurement from each order (1–7) from Google Earth Map. We assumed that stream lengths derived from GIS were constant and that error from this step was not propagated through to the upscaling. Our approach yielded a mean 1<sup>st</sup> stream channel width of 1.78 m, which is similar with the stream width reported by Downing and colleagues<sup>18</sup>, but wider than those reported more recently by Allen and colleagues<sup>19</sup>. A possible explanation for this difference may be that channel width to depth ratios at most of our sites are extremely high (> 60; see [Supplementary Table 1](#)), indicating that channels on the EQTP tend to adjust to increases in discharge by becoming wider rather than deeper.

Although our sampled streams and rivers were constrained to 3<sup>rd</sup>–7<sup>th</sup> order sites on the EQTP, N<sub>2</sub>O fluxes were measured in four catchments with distinct alpine landscape and different amounts of permafrost areas, capturing at least part of the spatiotemporal heterogeneity of the fluvial networks. In addition, a Monte Carlo simulation based on our data was used to provide upper and lower limits on the total flux estimate of 1<sup>st</sup>–7<sup>th</sup> order streams and rivers to bound the uncertainty. Despite current uncertainties, our range of the total value given for the region seems reasonable.



## Supplementary Figures

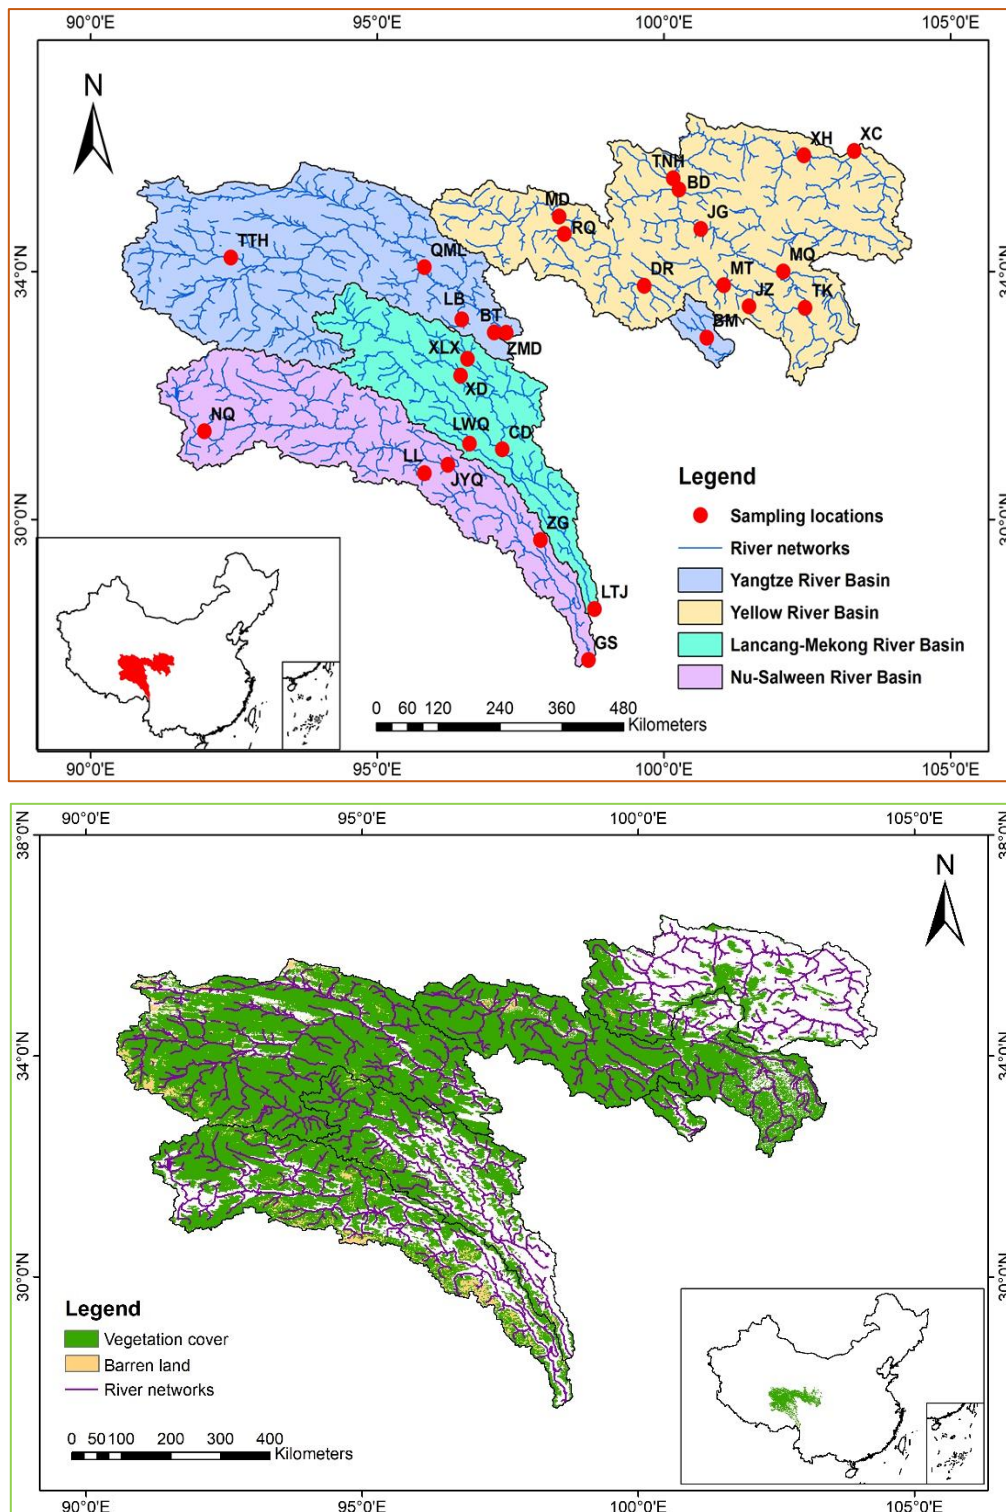

**Supplementary Figure 1 | Map of the four headwater basins on the East Qinghai-Tibet Plateau (EQTP), China. Names and locations of sampling stations (upper), and total vegetation cover (lower) in the four headwater basins of the EQTP.**

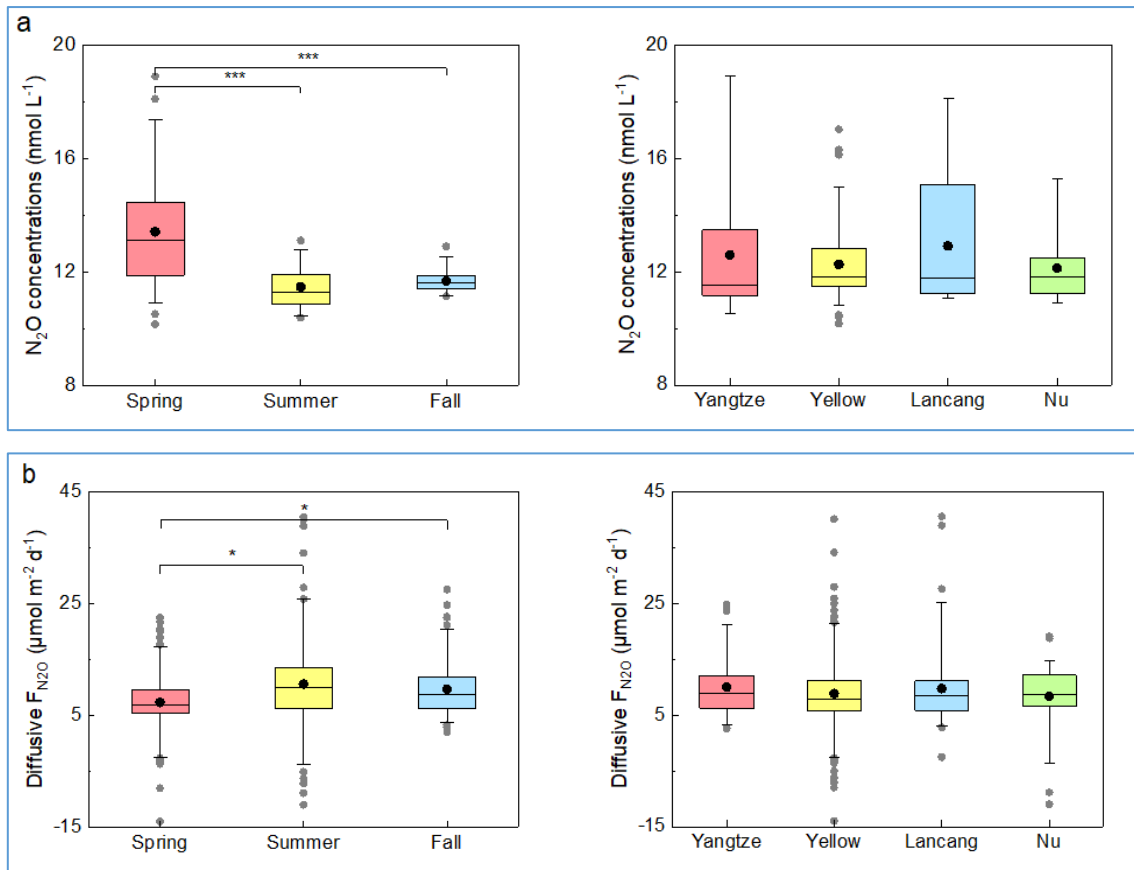

**Supplementary Figure 2 | Box plots of seasonal and regional patterns of N<sub>2</sub>O concentrations (a) and fluxes (b) from EQTP rivers.** Boxes represent the 25<sup>th</sup> and 75<sup>th</sup> percentiles, and error bars show the 95<sup>th</sup> percentiles; black circles and horizontal lines indicate the arithmetic means and medians, respectively. Grey circles are outliers. (one-way ANOVA with Tukey post hoc test, \**P* < 0.05; \*\**P* < 0.01; \*\*\**P* < 0.001).

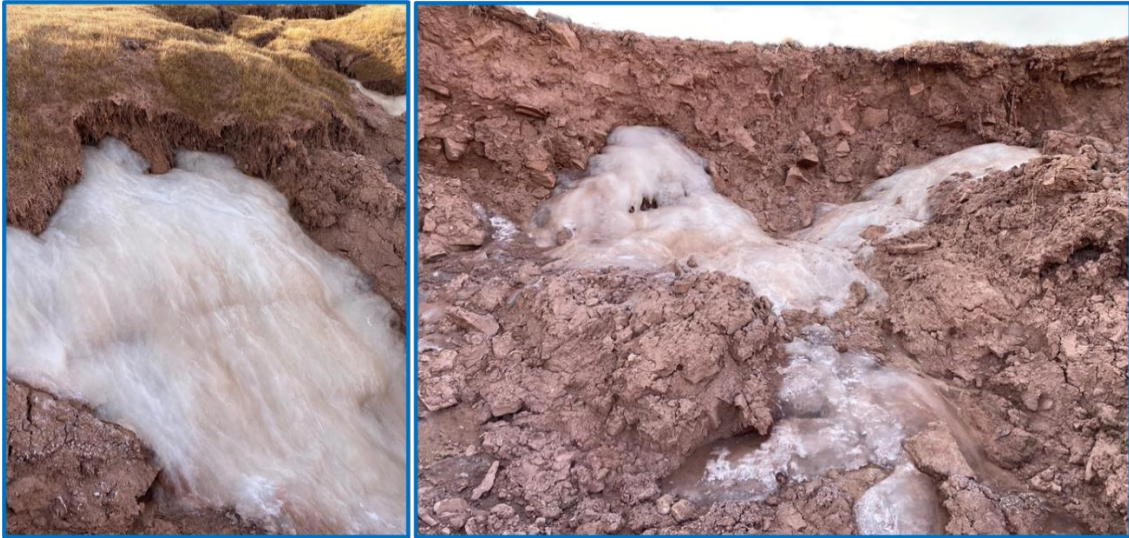

**Supplementary Figure 3 | Photographs of intermediate runoff above the permafrost active layer in the Yangtze River Catchment. The photos were taken in late October 2020.**

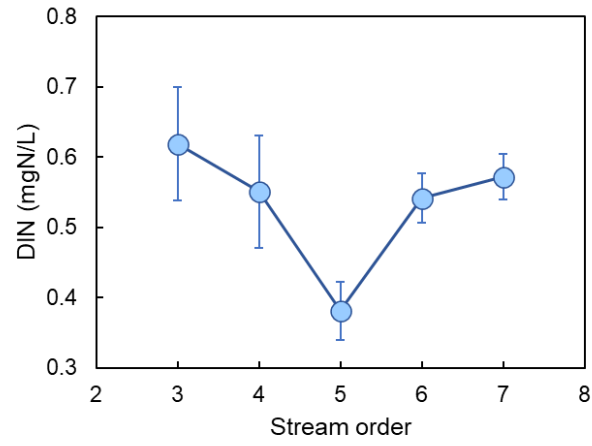

**Supplementary Figure 4 | DIN in relation to stream order across EQTP rivers.** Data points are the means and error bars represent  $\pm 1$  SE.

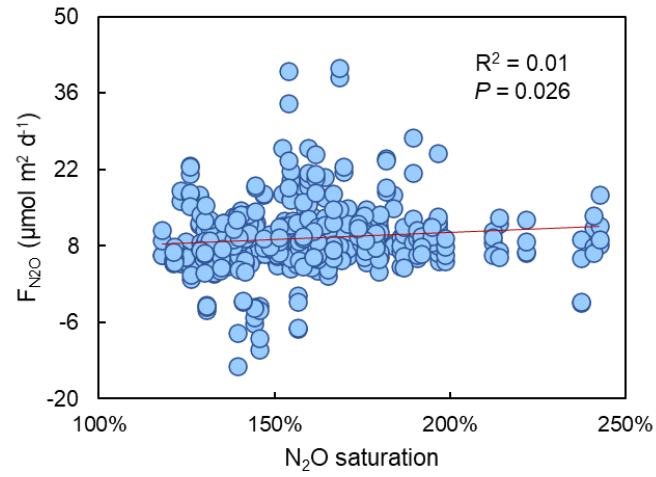

**Supplementary Figure 5 | Relationship between N<sub>2</sub>O saturation and fluxes.** The red line represents the fit of a linear regression through the observed data.

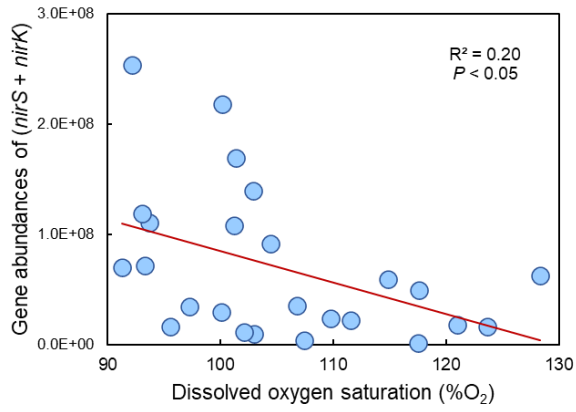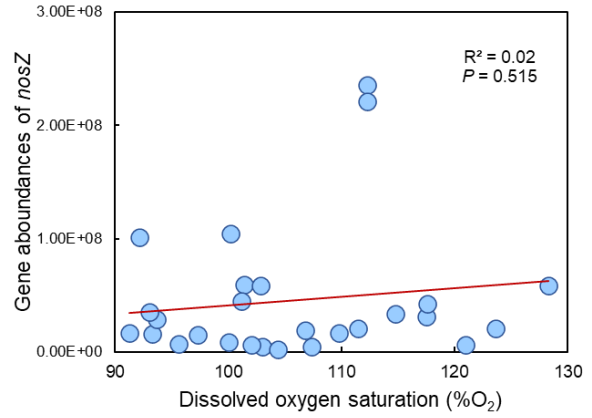

**Supplementary Figure 6 | Relationships between dissolved oxygen saturation (%O<sub>2</sub>) and gene abundances of (*nirS* + *nirK*) and *nosZ*.** The red lines represent the fit of linear regressions through the observed data.

## Supplementary Tables

**Supplementary Table 1. Summary information on sampling sites** (see [Supplementary Fig. 1](#) for site locations).

| Headwater Basins | Sampling Sites | Longitude (E) | Latitude (N) | Stream/river Reaches | Strahler Stream Order   | Elevation (m) | Water depth (m) | River width (m) | Flow velocity (m/s) | Discharge (m <sup>3</sup> /s) | Sediment type  | SS concentration (mg/L) |               |
|------------------|----------------|---------------|--------------|----------------------|-------------------------|---------------|-----------------|-----------------|---------------------|-------------------------------|----------------|-------------------------|---------------|
| Yangtze River    | Mainstem       | TTH           | 92°26'37"    | 34°13'15"            | Tuotuo River            | 6             | 4550            | 0.34            | 75.5                | 0.72                          | 18.5           | Muck                    | 99            |
|                  |                | QML           | 95°49'17"    | 34°04'01"            | Upper Tongtian River    | 7             | 4080            | 2.07 ± 1.06     | 174 ± 44.5          | 1.67 ± 0.7                    | 711.9 ± 790.5  | Muck                    | 198           |
|                  |                | ZMD           | 97°14'50"    | 33°00'32"            | Lower Tongtian River    | 7             | 3540            | 2.59 ± 1.31     | 157 ± 15.7          | 1.89 ± 0.73                   | 847.3 ± 906.3  | Gravel/cobble           | 208           |
|                  | Tributaries    | LB            | 96°28'23"    | 33°13'26"            | Longbao Creek           | 3             | 4210            | 0.64            | 15.4                | 1.2                           | 9.28           | Gravel/cobble           | 7             |
|                  |                | BT            | 97°02'28"    | 33°00'56"            | Batang Stream           | 4             | 3674            | 0.63 ± 0.18     | 37.0 ± 9.12         | 1.41 ± 0.4                    | 34.2 ± 9.68    | Gravel/cobble           | 29            |
|                  |                | BM            | 100°44'45"   | 32°55'43"            | Markog River            | 5             | 3555            | 0.6 ± 0.12      | 61.2 ± 21.2         | 1.08 ± 0.04                   | 57 ± 38.2      | Muck/sand               | 79            |
| Yellow River     | Mainstem       | MD            | 98°10'16"    | 34°53'08"            | Uppermost Yellow River  | 5             | 4274            | 0.65 ± 0.44     | 43.1 ± 29.8         | 0.65 ± 0.13                   | 24.4 ± 55      | Muck                    | 27 ± 30.4     |
|                  |                | DR            | 99°39'24"    | 33°46'02"            | Upper Yellow River      | 6             | 4008            | 0.97 ± 0.26     | 93.5 ± 28           | 1.23 ± 0.2                    | 146.2 ± 122.8  | Muck                    | 90.4 ± 92.5   |
|                  |                | MT            | 101°02'39"   | 33°46'30"            | Upper Yellow River      | 6             | 3715            | 1.91 ± 0.46     | 108 ± 23.5          | 1.42 ± 0.47                   | 283.3 ± 265.8  | Fine sand               | 30.8 ± 15.6   |
|                  |                | MQ            | 102°04'47"   | 33°59'46"            | Upper Yellow River      | 6             | 3469            | 2.4 ± 0.88      | 257 ± 11.5          | 0.69 ± 0.19                   | 553 ± 457.4    | Muck                    | 144.5 ± 73.6  |
|                  |                | JG            | 100°38'42"   | 34°41'02"            | Lower Yellow River      | 7             | 3126            | 2.2 ± 1.01      | 153 ± 15.1          | 1.95 ± 0.39                   | 694.8 ± 573.6  | Coarse sand             | 328.4 ± 277.4 |
|                  |                | BD            | 100°15'49"   | 35°19'17"            | Lower Yellow River      | 7             | 2760            | 1.83 ± 0.23     | 140 ± 12.5          | 1.73 ± 0.68                   | 509 ± 127.7    | Fine sand               | 628 ± 673.1   |
|                  |                | TNH           | 100°09'51"   | 35°29'60"            | Lower Yellow River      | 7             | 2711            | 2.67 ± 1.1      | 146 ± 2.79          | 2.1 ± 0.1                     | 886.8 ± 2.79   | Coarse sand             | 354.5 ± 337.3 |
|                  |                | XH            | 102°26'41"   | 35°52'13"            | Lower Yellow River      | 7             | 1880            | 2.67 ± 0.24     | 118 ± 7             | 1.32 ± 0.38                   | 463 ± 200.2    | Gravel/cobble           | 23.7 ± 17.4   |
|                  | XC             | 103°19'02"    | 35°56'22"    | Lower Yellow River   | 7                       | 1650          | 4.5 ± 1.06      | 146 ± 1.53      | 1.14 ± 0.65         | 934 ± 464.5                   | /              | 40 ± 14.1               |               |
|                  | Tributaries    | RQ            | 98°15'52"    | 34°36'05"            | Re Qu                   | 5             | 4255            | 0.66 ± 0.39     | 81.3 ± 3.99         | 0.73 ± 0.2                    | 35 ± 44.9      | Fine sand               | 19.7 ± 23.1   |
| JZ               |                | 101°28'59"    | 33°25'58"    | Sharkog Stream       | 3                       | 3653          | 0.55 ± 0.19     | 39.5 ± 3.48     | 1.12 ± 0.3          | 21.8 ± 21.6                   | Muck           | 15.8 ± 2.3              |               |
| TK               |                | 102°27'42"    | 33°24'38"    | White River          | 5                       | 3520          | 0.56 ± 0.26     | 225 ± 28.6      | 0.63 ± 0.13         | 62.3 ± 36.6                   | Muck           | 56 ± 11.9               |               |
| Lancang River    | Mainstem       | XD            | 96°27'07"    | 32°18'53"            | Zha Qu                  | 6             | 3690            | 1.45 ± 0.4      | 104 ± 3.39          | 1.47 ± 0.11                   | 248 ± 112.9    | Coarse sand             | 194.3 ± 36.1  |
|                  |                | CD            | 97°10'44"    | 31°07'38"            | Uppermost Lancang River | 7             | 3190            | 3.61 ± 0.7      | 89.9 ± 10.7         | 2.28 ± 0.4                    | 846.3 ± 442    | Gravel/cobble           | 198           |
|                  |                | LTJ           | 98°47'24"    | 28°33'08"            | Upper Lancang River     | 7             | 2079            | 8.67 ± 1.69     | 70.5 ± 9.79         | 2.38 ± 1.74                   | 1141.7 ± 544.1 | /                       | 241           |
|                  | Tributaries    | XLX           | 96°34'17"    | 32°35'20"            | Zi Qu                   | 4             | 3798            | 0.96 ± 0.09     | 46.8 ± 6.88         | 1.34 ± 0.13                   | 65 ± 27        | Gravel/cobble           | 38.3 ± 21.4   |
|                  |                | LWQ           | 96°36'24"    | 31°13'17"            | Purple Stream           | 5             | 3803            | 1.09 ± 0.2      | 66.3 ± 3.67         | 1.64 ± 0.17                   | 124.7 ± 58.4   | Coarse sand             | 89 ± 17       |
| Nu River         | Mainstem       | NQ            | 91°58'54"    | 31°25'20"            | Na Qu                   | 5             | 4601            | 0.83            | 80.5                | 1.38                          | 79.6           | Muck                    | 15.6          |
|                  |                | JYQ           | 96°14'01"    | 30°52'38"            | Upper Nu River          | 7             | 3198            | 6.33 ± 0.85     | 89.7 ± 3.18         | 2.35 ± 0.21                   | 1390 ± 340.4   | Coarse sand             | 153           |
|                  |                | GS            | 98°41'       | 27°44'               | Mid Nu River            | 7             | 1712            | 9.52 ± 0.83     | 114 ± 4.95          | 1.97                          | 2167.5 ± 512.7 | Fine sand               | 174           |
|                  | Tributaries    | LL            | 95°49'24"    | 30°44'30"            | Dromarangtso Creek      | 4             | 3639            | 0.63 ± 0.15     | 17.9 ± 7.02         | 1.78 ± 0.23                   | 17.9 ± 7.02    | Gravel/cobble           | 39 ± 34.8     |
|                  |                | ZG            | 97°50'49"    | 29°40'10"            | Yu Qu                   | 5             | 3775            | 0.76 ± 0.26     | 71.6 ± 6.26         | 1.32 ± 0.68                   | 71.6 ± 6.26    | Fine sand               | 104.3 ± 0.72  |

**Supplementary Table 2. Characteristics of the headwater catchments on the EQTP.**

|                                                                                                               | <b>Yangtze</b>     | <b>Upper Yellow</b> | <b>Nu</b>         | <b>Lancang</b>    | <b>Lower Yellow</b> |        |      |
|---------------------------------------------------------------------------------------------------------------|--------------------|---------------------|-------------------|-------------------|---------------------|--------|------|
| Catchment area (km <sup>2</sup> )                                                                             | 216,108            | 193,016             | 143,255           | 106,996           | 76,995              |        |      |
| Mean catchment altitude (m)                                                                                   | 3,935              | 3,842               | 3,385             | 3,312             | 2,425               |        |      |
| Permafrost coverage (km <sup>2</sup> )                                                                        | 205,735            | 140,130             | 87,959            | 56,264            | 16,400              |        |      |
| Permafrost fraction                                                                                           | 95.2%              | 72.6%               | 61.4%             | 52.6%             | 21.3%               |        |      |
| Vegetation coverage (km <sup>2</sup> )*                                                                       | 184,988            | 154,220             | 87,099            | 60,667            | 18,941              |        |      |
| Vegetation fraction                                                                                           | 85.6%              | 79.9%               | 60.8%             | 56.7%             | 24.6%               |        |      |
| Barren land (km <sup>2</sup> )*                                                                               | 9,295              | 4,878               | 11,904            | 3,072             | 966                 |        |      |
| Barren land fraction                                                                                          | 4.3%               | 2.5%                | 8.3%              | 2.9%              | 1.3%                |        |      |
| Human population ( $\times 10^4$ ) <sup>†</sup>                                                               | 28.8               | 20.1                | 36.2              | 39.3              | 65.0                |        |      |
| Population density (km <sup>-2</sup> )                                                                        | 1.3                | 1.3                 | 2.5               | 3.7               | 8.4                 |        |      |
| Annual temperature (°C) <sup>§</sup>                                                                          | 1.4                | 1.2                 | 7.1               | 6.4               | 5.1                 |        |      |
| Annual precipitation (mm) <sup>§</sup>                                                                        | 1,855.8            | 2,768.3             | 2,102.3           | 1,619.3           | 1,541.7             |        |      |
| Spring                                                                                                        | 609.3              | 858.9               | 745.5             | 491.7             | 436.4               |        |      |
| Summer                                                                                                        | 718.3              | 1,086.0             | 845.2             | 709.4             | 792.7               |        |      |
| Fall                                                                                                          | 528.2              | 823.4               | 511.6             | 418.2             | 312.6               |        |      |
| <b>Means (<math>\pm</math> standard deviation) of physicochemical property measured in streams and rivers</b> |                    |                     |                   |                   |                     |        |      |
| DOC (mgC/L)                                                                                                   | 7.18 $\pm$ 3.26    | 5.34 $\pm$ 2.08     | 4.42 $\pm$ 2.61   | 4.52 $\pm$ 1.94   | 5.24 $\pm$ 2.35     |        |      |
| DIN (mgN/L)                                                                                                   | 0.62 $\pm$ 0.22    | 0.44 $\pm$ 0.23     | 0.47 $\pm$ 0.23   | 0.59 $\pm$ 0.19   | 0.71 $\pm$ 0.51     |        |      |
| TP (mg/L)                                                                                                     | 0.25 $\pm$ 0.36    | 0.12 $\pm$ 0.14     | 0.23 $\pm$ 0.23   | 0.14 $\pm$ 0.12   | 0.25 $\pm$ 0.43     |        |      |
| pH                                                                                                            | 8.22 $\pm$ 0.16    | 8.34 $\pm$ 0.20     | 8.37 $\pm$ 0.17   | 8.22 $\pm$ 0.12   | 8.40 $\pm$ 0.16     |        |      |
| DO (mg/L)                                                                                                     | 6.87 $\pm$ 0.89    | 6.87 $\pm$ 0.68     | 7.13 $\pm$ 0.89   | 6.97 $\pm$ 0.67   | 7.59 $\pm$ 0.61     |        |      |
| Conductivity ( $\mu$ S/cm)                                                                                    | 1003.8 $\pm$ 784.5 | 277.2 $\pm$ 202.5   | 486.5 $\pm$ 194.2 | 227.2 $\pm$ 194.7 | 398.8 $\pm$ 98.2    |        |      |
| ORP (mV)                                                                                                      | 150.8 $\pm$ 26.0   | 151.7 $\pm$ 56.2    | 139.1 $\pm$ 31.6  | 140.4 $\pm$ 21.2  | 154.0 $\pm$ 98.8    |        |      |
| Water temperature (°C)                                                                                        | 12.3 $\pm$ 3.5     | 12.1 $\pm$ 3.4      | 14.6 $\pm$ 2.6    | 13.6 $\pm$ 3.1    | 13.4 $\pm$ 3.1      |        |      |
| <b>Sampling Time</b>                                                                                          |                    |                     |                   |                   |                     |        |      |
|                                                                                                               | 2016               |                     |                   | 2017              |                     | 2018   |      |
|                                                                                                               | Spring             | Summer              | Fall              | Spring            | Summer              | Spring | Fall |
| Yangtze                                                                                                       |                    |                     |                   | √                 | √                   | √      | √    |
| Yellow                                                                                                        | √                  | √                   | √                 | √                 | √                   | √      | √    |
| Lancang                                                                                                       |                    |                     |                   |                   | √                   | √      | √    |
| Nu                                                                                                            |                    |                     |                   |                   | √                   | √      | √    |

Note that the Yellow River was divided into Upper and Lower Yellow Catchments at JG site based on the permafrost fraction (Supplementary Fig. 1 and Table 1).

\*Vegetation coverage and barren land was calculated from ref<sup>20</sup>.

<sup>†</sup>Human population was obtained from National Bureau of Statistics (www.stats.gov.cn/).



§Average annual temperature and precipitation was obtained from National Meteorological Information Center (<http://data.cma.cn/>).

**Supplementary Table 3. N<sub>2</sub>O data for EQTP rivers and other lotic systems worldwide.**

| Latitude                | Regions                          | Lotic Systems                   | N <sub>2</sub> O       |                                                        |            | EF <sub>5-r</sub> = $\frac{N_2O-N}{NO_3-N}$<br>(mass ratio) | Ref.  |
|-------------------------|----------------------------------|---------------------------------|------------------------|--------------------------------------------------------|------------|-------------------------------------------------------------|-------|
|                         |                                  |                                 | Concentrations<br>(nM) | Fluxes [ $\mu\text{mol}/(\text{m}^2 \cdot \text{d})$ ] |            |                                                             |       |
|                         |                                  |                                 |                        | Diffusion                                              | Ebullition |                                                             |       |
| < 24°                   | Sub-Saharan Africa               | Sub-Saharan African rivers      | 9.2                    | 13.0                                                   | /          | /                                                           | 21    |
|                         |                                  | Congo River                     | 7.9                    | 22.0                                                   | /          | 0.28%                                                       | 22    |
|                         | Kenya                            | Mara River                      | 18.2                   | 13.7                                                   | /          | 0.05%                                                       | 23    |
|                         | Malaysia                         | Malaysian rivers                | 11.7                   | 21.3                                                   | /          | 0.10%                                                       | 24,25 |
|                         | Ecuador                          | Cuenca River                    | /                      | 30.0                                                   | /          | /                                                           | 26    |
| 24-54°                  | South Asia                       | Adyar River                     | 26.5                   | 21.0                                                   | /          | 0.26%                                                       | 27    |
|                         |                                  | Ganges River                    | 31.2                   | 13.7                                                   | /          | 0.03%                                                       | 28    |
|                         |                                  | Sênggê Tsangpo-Indus River      | 0.21 $\mu\text{atm}$   | 4.6                                                    | /          | /                                                           | 29    |
|                         | Southeast Asia                   | Mekong River                    | 30.7                   | 13.6                                                   | /          | 0.14%                                                       | 28    |
|                         |                                  | Jiulong River                   | 59.1                   | 13.5                                                   | /          | 0.03%                                                       | 30    |
|                         | China                            | Wu River                        | 33.3                   | 15.3                                                   | /          | 0.16%                                                       | 31    |
|                         |                                  | Yongan River                    | 16.9                   | 20.1                                                   | /          | 0.04%                                                       | 32    |
|                         |                                  | Chongqing river network         | 113.8                  | 261.6                                                  | /          | 0.47%                                                       | 33    |
|                         |                                  | Shanghai river network          | /                      | 68.2                                                   | /          | /                                                           | 34    |
|                         |                                  | Beijing river network           | 42.5                   | 83.4                                                   | /          | 0.10%                                                       | 35    |
| Yarlung Tsangpo         |                                  | 13.4                            | 5.7–13.2               | /                                                      | 0.17%      | 36                                                          |       |
| EQTP rivers             |                                  | 12.4<br>(0.34 $\mu\text{atm}$ ) | 9.4                    | 0.74                                                   | 0.17%      | This study                                                  |       |
| Yangtze River (lowland) |                                  | 15.9                            | 12.1                   | /                                                      | 0.04%      | 37                                                          |       |
| UK                      | Yellow River (lowland)           | 22.4                            | 42.6                   | /                                                      | 0.03%      | 38                                                          |       |
|                         | Xilin River                      | /                               | 24.3                   | /                                                      | /          | 39                                                          |       |
| France                  | Upper Thurne River               | 82.3                            | 129.8                  | /                                                      | 0.27%      | 40                                                          |       |
|                         | Wensum, Eden & Avon River        | 51.7                            | 50.0                   | /                                                      | 0.024%     | 41                                                          |       |
| Belgium                 | Seine River                      | 36.8                            | 69.9                   | /                                                      | 0.02%      | 42,43                                                       |       |
| Canada                  | Meuse River                      | 42.9                            | /                      | /                                                      | 0.37%      | 44                                                          |       |
|                         | Grand River                      | /                               | -35–4,200              | /                                                      | /          | 45                                                          |       |
| USA                     | Ontario streams                  | /                               | -3.2–776               | < 0.004                                                | /          | 46,47                                                       |       |
|                         | San Joaquin River                | 32.5                            | 8.1–318.9              | /                                                      | 0.28%      | 48                                                          |       |
|                         | Agricultural streams in Illinois | 71.4                            | 102.9                  | /                                                      | /          | 49                                                          |       |
|                         | Hudson River                     | 0.58 $\mu\text{atm}$            | 5.5                    | /                                                      | /          | 50                                                          |       |
|                         | Kalamazoo River                  | 28.9                            | 30.2                   | /                                                      | 0.20%      | 51                                                          |       |
|                         | Connecticut River                | 15.4                            | 28.9                   | /                                                      | 0.22%      | 52                                                          |       |
|                         | Lamprey River                    | 0.8 $\mu\text{atm}$             | 46.8                   | /                                                      | /          | 53                                                          |       |

|             |                                |                                          |           |          |       |       |       |
|-------------|--------------------------------|------------------------------------------|-----------|----------|-------|-------|-------|
|             | Upper Mississippi River        | /                                        | 0.72      | /        | /     | 54    |       |
|             | Streams within the Corn Belt   | /                                        | 0.03–49.7 | /        | /     | 55    |       |
|             | Agricultural headwater streams | /                                        | 41.8      | /        |       |       |       |
|             | Urban headwater streams        | /                                        | 49.2      | /        | 0.75% | 56    |       |
|             | Pristine headwater streams     | /                                        | 4.2       | /        |       |       |       |
| Australia   | New South Waters               | /                                        | 4.0       | /        | /     | 57    |       |
| New Zealand | LII river                      | 46.9                                     | 96.7      | 7.9 µL/L | 0.03% | 58,59 |       |
|             | Ashburton River                | 12.3                                     | 14.6–27   | /        | 0.06% | 60    |       |
|             | Sweden                         | Swedish low-order streams                | 50.0      | 141.5    | /     | 0.63% | 61,62 |
| > 54°       | Canada                         | Québec streams & rivers                  | 5.9       | 9.4      | /     | 0.86% | 63    |
|             | USA                            | Water tracks within the Upper Kupa River | /         | -10.3    | /     | /     | 64    |
|             | Global streams and rivers      |                                          | 37.5      | 94.3     | /     | 0.22% | 65    |

Note that grey shaded are mountain streams and rivers.

**Supplementary Table 4. Simple linear regression of N<sub>2</sub>O concentration as functions of environmental variables.** R<sup>2</sup> values are shown for regressions with *P* values. Direction of correlations is indicated as ‘+’ for positive and ‘-’ for negative. Significant relationships are shaded.

| <b>Environmental variables</b> | <b>R<sup>2</sup></b> | <b><i>P</i> value</b> | <b>Direction of the correlation</b> |
|--------------------------------|----------------------|-----------------------|-------------------------------------|
| Air pressure                   | 0.02                 | > 0.05                | +                                   |
| Water temperature              | 0.02                 | > 0.05                | -                                   |
| pH                             | 0.004                | > 0.05                | +                                   |
| DO                             | 0.004                | > 0.05                | -                                   |
| %O <sub>2</sub>                | 0.2                  | < 0.001               | -                                   |
| DOC                            | 0.03                 | 0.049                 | -                                   |
| NH <sub>4</sub> <sup>+</sup>   | 0.1                  | < 0.001               | +                                   |
| NO <sub>3</sub> <sup>-</sup>   | 0.23                 | < 0.001               | +                                   |
| Log TP                         | 0.07                 | 0.004                 | +                                   |

**Supplementary Table 5. N<sub>2</sub>O yields in EQTP rivers and existing reports for other lotic settings.**

| Lotic settings             | N <sub>2</sub> O yields (%) |            | Ref.       |
|----------------------------|-----------------------------|------------|------------|
|                            | Mean                        | Range      |            |
| Lower Yangtze River        | 0.82                        | 0.51–1.12  | 37         |
| Yellow River (lowland)     | 1.13                        | 0.06–6.24  | 38         |
| Beijing river networks     | 1.6                         | 0.01–23.1  | 35         |
| US headwater streams       | 0.9                         | 0.04–5.6   | 56         |
| Choptank & Nanticoke River | 2.60                        | 0.48–6.11  | 66         |
| Tippecanoe River           | 0.94                        | 0.78–1.1   | 67         |
| Kalamazoo River            | 12.0                        | 0.9–53.8   | 68         |
| Seine River                | 1.5                         | ≤ 7.0      | 69         |
| UK estuaries               | 0.7                         | 0.52–0.77  | 70         |
| EQTP rivers                | 0.23                        | 0.003–0.87 | This study |

**Supplementary Table 6. Laboratory-measurement of benthic N<sub>2</sub>O production rates by the Yellow River sediments compared to measured field (*in situ*) fluxes and the estimated contribution of benthic fluxes to total N<sub>2</sub>O emissions.**

|                       | Sites | Lab benthic F <sub>N<sub>2</sub>O</sub><br>( $\mu\text{mol m}^{-2} \text{d}^{-1}$ ) | <i>in situ</i> F <sub>N<sub>2</sub>O</sub><br>( $\mu\text{mol m}^{-2} \text{d}^{-1}$ ) | Contribution<br>(%) |
|-----------------------|-------|-------------------------------------------------------------------------------------|----------------------------------------------------------------------------------------|---------------------|
| Permafrost-rich sites | MD    | -1.45                                                                               | 13.44                                                                                  | -10.8               |
|                       | RQ    | -0.62                                                                               | 14.06                                                                                  | -4.4                |
|                       | DR    | -0.76                                                                               | 8.77                                                                                   | -8.7                |
|                       | MT*   | 22.14                                                                               | 10.83                                                                                  | 204.4               |
|                       | JZ    | -1.37                                                                               | 9.14                                                                                   | -15.0               |
|                       | MQ*   | 17.06                                                                               | 18.56                                                                                  | 91.9                |
| Permafrost-poor sites | TK    | 0.04                                                                                | 7.08                                                                                   | 0.6                 |
|                       | JG    | -0.69                                                                               | 8.85                                                                                   | -7.8                |
|                       | TNH   | -1.24                                                                               | 9.90                                                                                   | -12.5               |

\*The ratios of (*nirS* + *nirK*)/*nosZ* for MT and MQ were 2.6 times higher than those for other sites, suggesting the N<sub>2</sub>O yields were higher at the two sites.

**Supplementary Table 7. Summary of *nir* and *nosZ* gene abundances for EQTP riverbed sediments and other lotic systems worldwide.**

| Lotic systems   | Functional gene abundances (copies/g dw) |                    |                          |                           | Ratios                 |                      | Ref.       |
|-----------------|------------------------------------------|--------------------|--------------------------|---------------------------|------------------------|----------------------|------------|
|                 | <i>nirS</i>                              | <i>nirK</i>        | <i>nosZ</i> <sub>I</sub> | <i>nosZ</i> <sub>II</sub> | $(nirS + nirK)/nosZ_I$ | $(nirS + nirK)/nosZ$ |            |
| Pearl River     | $166 \times 10^8$                        | $7.12 \times 10^8$ | $8.05 \times 10^8$       | /                         | 21.5                   | 21.5                 | 71         |
| Nanfei River    | $3.6 \times 10^8$                        | $0.8 \times 10^8$  | $1.3 \times 10^8$        | /                         | 3.38                   | 3.38                 | 72         |
| Tama River*     | $3.31 \times 10^5$                       | $3.80 \times 10^5$ | $3.10 \times 10^5$       | $0.19 \times 10^5$        | 2.29                   | 2.16                 | 73         |
| Olentangy River | $14.3 \times 10^8$                       | $2.1 \times 10^8$  | $0.3 \times 10^8$        | /                         | 54.7                   | 54.7                 | 74         |
| Deba River      | $9.17 \times 10^{11}$                    | $6.95 \times 10^9$ | $2.93 \times 10^5$       | /                         | $3.24 \times 10^6$     | $3.24 \times 10^6$   | 75         |
| Rhône River     | $2.4 \times 10^7$                        | $0.2 \times 10^7$  | $0.1 \times 10^7$        | $0.7 \times 10^7$         | 26.0                   | 3.25                 | 76         |
| Garonne River   | $5.2 \times 10^9$                        | $6.3 \times 10^9$  | $0.72 \times 10^9$       | /                         | 16.0                   | 16.0                 | 77         |
| EQTP rivers     | $6.32 \times 10^7$                       | $2.60 \times 10^7$ | $4.44 \times 10^7$       | $0.11 \times 10^7$        | 2.01                   | 1.96                 | This study |

Note that some studies failed to quantify *nosZ*<sub>II</sub>, so we also compared our ratio of  $(nirS + nirK)/nosZ_I$  with this subset of references. Our ratio is still the smallest, even lower than those for Tama River.

\*Functional gene abundances for the Tama River (copies/L) were measured in the overlying water instead of sediments, so both functional genes abundances and ratios of  $(nirS + nirK)/nosZ$  were much lower than those of other studies. Despite this sampling difference, the ratios still exceed that observed in EQTP rivers.

**Supplementary Table 8. The results of stepwise selection of predictive variables in multiple linear regression with N<sub>2</sub>O flux.**

| Environmental variables      | Unstandardized Coefficients |            | Standardized Coefficients | <i>t</i> | Sig.    |
|------------------------------|-----------------------------|------------|---------------------------|----------|---------|
|                              | Beta                        | Std. Error | Beta                      |          |         |
| %O <sub>2</sub>              | -0.150                      | 0.028      | -0.259                    | -5.352   | < 0.001 |
| pH                           | 3.078                       | 0.721      | 0.202                     | 4.270    | < 0.001 |
| Water temperature            | 0.235                       | 0.072      | 0.155                     | 3.271    | 0.001   |
| TP                           | -1.491                      | 0.560      | -0.132                    | -2.665   | 0.008   |
| NO <sub>3</sub> <sup>-</sup> | 2.569                       | 1.113      | 0.112                     | 2.308    | 0.022   |
| Constant                     | -6.369                      | 6.938      |                           | -0.918   | 0.359   |



**Supplementary Table 9. N<sub>2</sub>O emissions in per unit stream/river surface area and basin area from EQTP waterways and other lotic settings worldwide.**

| Streams & rivers                                 | Stream/river surface area (km <sup>2</sup> ) | Basin Area (× 10 <sup>4</sup> km <sup>2</sup> ) | N <sub>2</sub> O emissions (GgN <sub>2</sub> O-N/yr) | Per unit river surface area [tN <sub>2</sub> O-N/(km <sup>2</sup> ·yr)] | Per unit basin area [kgN <sub>2</sub> O-N/(km <sup>2</sup> ·yr)] | Percentage of N <sub>2</sub> O in GHG emissions | Ref.                              |
|--------------------------------------------------|----------------------------------------------|-------------------------------------------------|------------------------------------------------------|-------------------------------------------------------------------------|------------------------------------------------------------------|-------------------------------------------------|-----------------------------------|
| Congo River*                                     | 23,209                                       | 370.5                                           | 5.16                                                 | 0.22                                                                    | 1.39                                                             | 0.2%                                            | 22                                |
| Malaysian rivers                                 | 790                                          | 6.06                                            | 0.35                                                 | 0.44                                                                    | 5.78                                                             | 4.6%                                            | 25,78                             |
| Adyar River                                      | 6.9                                          | 0.05                                            | 1.53 × 10 <sup>-3</sup>                              | 0.22                                                                    | 2.89                                                             | 7.2%                                            | 27,79                             |
| Yongan River                                     | /                                            | 0.25                                            | 6.56 × 10 <sup>-3</sup>                              | /                                                                       | 2.65                                                             | /                                               | 32                                |
| Shanghai river network                           | 570                                          | /                                               | 0.29                                                 | 0.51                                                                    | /                                                                | 2.8%                                            | 34,80                             |
| Beijing river network                            | 216                                          | /                                               | 0.14                                                 | 0.65                                                                    | /                                                                | 13.9%                                           | 35,81                             |
| Seine River                                      | 283                                          | 7.17                                            | 0.24                                                 | 0.85                                                                    | 3.35                                                             | 4.9%                                            | 42,43                             |
| Rabbit River                                     | 3.6                                          | 0.07                                            | 1.09 × 10 <sup>-3</sup>                              | 0.30                                                                    | 1.56                                                             | /                                               | 51                                |
| Grand River                                      | /                                            | 0.68                                            | 0.01                                                 | /                                                                       | 1.37                                                             | /                                               | 45                                |
| Swedish low-order streams                        | 697                                          | /                                               | 1.78                                                 | 2.55                                                                    | /                                                                | 7.5%                                            | 62,82                             |
| Boreal rivers in Québec*                         | 1,445                                        | 20.4                                            | 0.11                                                 | 0.08                                                                    | 0.55                                                             | 1.2%                                            | 63,83                             |
| EQTP 3 <sup>rd</sup> –7 <sup>th</sup> rivers*    | 2,603                                        | 73.6                                            | 0.21                                                 | 0.08                                                                    | 0.28                                                             | 1.0%                                            | This study and ref. <sup>84</sup> |
| EQTP 1 <sup>st</sup> –7 <sup>th</sup> waterways* | 3,049                                        |                                                 | 0.28                                                 | 0.09                                                                    | 0.37                                                             | 0.4%                                            |                                   |
| QTP 1 <sup>st</sup> –7 <sup>th</sup> waterways*  | 5,141                                        | 116.7                                           | 0.43–0.46                                            | 0.09                                                                    | 0.37                                                             | /                                               |                                   |

\*The Congo River, Québec rivers and QTP rivers are pristine (limited anthropogenic influence) rivers; the remaining rivers are human-impacted systems.

**Supplementary Table 10. Primer pairs used in this study and corresponding amplification protocols.**

| Specificity              | Primer                | Sequence (5'–3')       | Thermal conditions                           | Ref. |
|--------------------------|-----------------------|------------------------|----------------------------------------------|------|
| <i>nirS</i>              | cd3af                 | G TSAACG TSAAGGARACSGG | (95 °C, 3 min) × 1                           | 8    |
|                          | R3cd                  | GASTTCGGRTGSGTCTTGA    | (95 °C, 30 s; 58 °C, 40 s; 72 °C, 40 s) × 40 |      |
| <i>nirK</i>              | F1aCu                 | ATCATGGTSCTGCCGCG      | (95 °C, 3 min) × 1                           | 9    |
|                          | R3Cu                  | GCCTCGATCAGRTTGTGGTT   | (95 °C, 30 s; 60 °C, 30 s; 72 °C, 40 s) × 40 |      |
| <i>nosZ<sub>I</sub></i>  | nosZ2F                | CGCRACGGCAASAAGGTSMSST | (95 °C, 3 min) × 1                           | 9    |
|                          | nosZ2R                | CAKRTGCAKSGCRTGGCAGAA  | (95 °C, 30 s; 60 °C, 30 s; 72 °C, 30 s) × 40 |      |
| <i>nosZ<sub>II</sub></i> | nosZ <sub>II</sub> -F | CTIGGICCIYTKCAYAC      | (95 °C, 3 min) × 1                           | 10   |
|                          | nosZ <sub>II</sub> -R | GCIGARCARAAITCBGTRC    | (95 °C, 30 s; 54 °C, 45 s; 72 °C, 45 s) × 40 |      |

## Supplementary References

- 1 Kana, T. M. *et al.* Membrane inlet mass spectrometer for rapid high-precision determination of N<sub>2</sub>, O<sub>2</sub>, and Ar in environmental water samples. *Analytical Chemistry* **66**, 4166-4170, doi:10.1021/ac00095a009 (1994).
- 2 Laursen, A. E. & Seitzinger, S. P. Measurement of denitrification in rivers: an integrated, whole reach approach. *Hydrobiologia* **485**, 67-81, doi:10.1023/A:1021398431995 (2002).
- 3 Weiss, R. F. The solubility of nitrogen, oxygen and argon in water and seawater. *Deep Sea Research and Oceanographic Abstracts* **17**, 721-735, doi:10.1016/0011-7471(70)90037-9 (1970).
- 4 Zhang, S. *et al.* Both microbial abundance and community composition mattered for N<sub>2</sub> production rates of the overlying water in one high-elevation river. *Environmental Research* **189**, 109933, doi:10.1016/j.envres.2020.109933 (2020).
- 5 Johnson, K. M., Hughes, J. E., Donaghay, P. L. & Sieburth, J. M. Bottle-calibration static head space method for the determination of methane dissolved in seawater. *Analytical Chemistry* **62**, 2408-2412, doi:10.1021/ac00220a030 (1990).
- 6 Zumft, W. G. Cell biology and molecular basis of denitrification. *Microbiology and Molecular Biology Reviews* **61**, 533-616 (1997).
- 7 Hallin, S., Philippot, L., Löffler, F. E., Sanford, R. A. & Jones, C. M. Genomics and ecology of novel N<sub>2</sub>O-reducing microorganisms. *Trends in Microbiology* **26**, 43-55, doi:10.1016/j.tim.2017.07.003 (2018).
- 8 Throbäck, I. N., Enwall, K., Jarvis, Å. & Hallin, S. Reassessing PCR primers targeting *nirS*, *nirK* and *nosZ* genes for community surveys of denitrifying bacteria with DGGE. *FEMS Microbiology Ecology* **49**, 401-417, doi:10.1016/j.femsec.2004.04.011 (2004).
- 9 Henry, S., Bru, D., Stres, B., Hallet, S. & Philippot, L. Quantitative detection of the *nosZ* gene, encoding nitrous oxide reductase, and comparison of the abundances of 16S rRNA, *narG*, *nirK*, and *nosZ* genes in soils. *Applied and Environmental Microbiology* **72**, 5181-5189, doi:10.1128/aem.00231-06 (2006).
- 10 Jones, C. M., Graf, D. R. H., Bru, D., Philippot, L. & Hallin, S. The unaccounted yet abundant nitrous oxide-reducing microbial community: a potential nitrous oxide sink. *The ISME Journal* **7**, 417-426, doi:10.1038/ismej.2012.125 (2013).
- 11 Chen, H. *et al.* The impacts of climate change and human activities on biogeochemical cycles on the Qinghai-Tibetan Plateau. *Global Change Biology* **19**, 2940-2955, doi:10.1111/gcb.12277 (2013).
- 12 Tremblay, J. C. & Ainslie, P. N. Global and country-level estimates of human population at high altitude. *Proceedings of the National Academy of Sciences* **118**, e2102463118, doi:10.1073/pnas.2102463118 (2021).
- 13 Li, X., Gao, E., Li, B. & Zhan, X. Estimating abundance of Tibetan wild ass, Tibetan gazelle and Tibetan antelope using species distribution model and distance sampling (in Chinese). *SCIENTIA SINICA Vitae* **49**, 151, doi:10.1360/N052018-00171 (2019).
- 14 Xia, X. *et al.* Triple oxygen isotopic evidence for atmospheric nitrate and its application in source identification for river systems in the Qinghai-Tibetan Plateau. *Science of The Total Environment* **688**, 270-280, doi:10.1016/j.scitotenv.2019.06.204 (2019).
- 15 Guo, X. *et al.* Using stable nitrogen and oxygen isotopes to identify nitrate sources in the Lancang River, upper Mekong. *Journal of Environmental Management* **274**, 111197, doi:10.1016/j.jenvman.2020.111197 (2020).
- 16 Körner, H. & Zumft, W. G. Expression of denitrification enzymes in response to the dissolved oxygen

- level and respiratory substrate in continuous culture of *Pseudomonas stutzeri*. *Applied and Environmental Microbiology* **55**, 1670-1676 (1989).
- 17 Qu, Z., Bakken, L. R., Molstad, L., Frostegård, Å. & Bergaust, L. L. Transcriptional and metabolic regulation of denitrification in *Paracoccus denitrificans* allows low but significant activity of nitrous oxide reductase under oxic conditions. *Environmental Microbiology* **18**, 2951-2963, doi:10.1111/1462-2920.13128 (2016).
- 18 Downing, J. A. *et al.* Global abundance and size distribution of streams and rivers. *Inland Waters* **2**, 229-236, doi:10.5268/IW-2.4.502 (2012).
- 19 Allen, G. H. *et al.* Similarity of stream width distributions across headwater systems. *Nature Communications* **9**, 610, doi:10.1038/s41467-018-02991-w (2018).
- 20 Wang, Z. *et al.* Mapping the vegetation distribution of the permafrost zone on the Qinghai-Tibet Plateau. *Journal of Mountain Science* **13**, 1035-1046, doi:10.1007/s11629-015-3485-y (2016).
- 21 Borges, A. V. *et al.* Globally significant greenhouse-gas emissions from African inland waters. *Nature Geoscience* **8**, 637-642, doi:10.1038/ngeo2486 (2015).
- 22 Borges, A. V. *et al.* Variations in dissolved greenhouse gases (CO<sub>2</sub>, CH<sub>4</sub>, N<sub>2</sub>O) in the Congo River network overwhelmingly driven by fluvial-wetland connectivity. *Biogeosciences* **16**, 3801-3834, doi:10.5194/bg-16-3801-2019 (2019).
- 23 Mwanake, R. M. *et al.* Land use, not stream order, controls N<sub>2</sub>O concentration and flux in the Upper Mara River Basin, Kenya. *Journal of Geophysical Research: Biogeosciences* **124**, 3491-3506, doi:10.1029/2019JG005063 (2019).
- 24 Müller, D. *et al.* Nitrous oxide and methane in two tropical estuaries in a peat-dominated region of northwestern Borneo. *Biogeosciences* **13**, 2415-2428, doi:10.5194/bg-13-2415-2016 (2016).
- 25 Bange, H. W. *et al.* Nitrous oxide (N<sub>2</sub>O) and methane (CH<sub>4</sub>) in rivers and estuaries of northwestern Borneo. *Biogeosciences* **16**, 4321-4335, doi:10.5194/bg-16-4321-2019 (2019).
- 26 Ho, L. *et al.* Effects of land use and water quality on greenhouse gas emissions from an urban river system. *Biogeosciences Discuss.* **2020**, 1-22, doi:10.5194/bg-2020-311 (2020).
- 27 Nirmal Rajkumar, A., Barnes, J., Ramesh, R., Purvaja, R. & Upstill-Goddard, R. C. Methane and nitrous oxide fluxes in the polluted Adyar River and estuary, SE India. *Marine Pollution Bulletin* **56**, 2043-2051, doi:10.1016/j.marpolbul.2008.08.005 (2008).
- 28 Begum, M. S. *et al.* Localized pollution impacts on greenhouse gas dynamics in three anthropogenically modified Asian river systems. *Journal of Geophysical Research: Biogeosciences* **126**, e2020JG006124, doi:10.1029/2020JG006124 (2021).
- 29 Qu, B. *et al.* Greenhouse gases emissions in rivers of the Tibetan Plateau. *Scientific Reports* **7**, 16573, doi:10.1038/s41598-017-16552-6 (2017).
- 30 Chen, N., Wu, J., Zhou, X., Chen, Z. & Lu, T. Riverine N<sub>2</sub>O production, emissions and export from a region dominated by agriculture in Southeast Asia (Jiulong River). *Agriculture, Ecosystems & Environment* **208**, 37-47, doi:10.1016/j.agee.2015.04.024 (2015).
- 31 Liang, X. *et al.* Control of the hydraulic load on nitrous oxide emissions from cascade reservoirs. *Environmental Science & Technology* **53**, 11745-11754, doi:10.1021/acs.est.9b03438 (2019).
- 32 Hu, M. *et al.* Modeling riverine N<sub>2</sub>O sources, fates, and emission factors in a typical river network of Eastern China. *Environmental Science & Technology* **55**, 13356-13365, doi:10.1021/acs.est.1c01301 (2021).
- 33 He, Y. *et al.* Effect of watershed urbanization on N<sub>2</sub>O emissions from the Chongqing metropolitan river network, China. *Atmospheric Environment* **171**, 70-81, doi:10.1016/j.atmosenv.2017.09.043

- (2017).
- 34 Yu, Z. *et al.* Nitrous oxide emissions in the Shanghai river network: Implications for the effects of urban sewage and IPCC methodology. *Global Change Biology* **19**, 2999-3010, doi:10.1111/gcb.12290 (2013).
- 35 Wang, G. *et al.* Distinctive patterns and controls of nitrous oxide concentrations and fluxes from urban inland waters. *Environmental Science & Technology* **55**, 8422-8431, doi:10.1021/acs.est.1c00647 (2021).
- 36 Ye, R. *et al.* Concentrations and emissions of dissolved CH<sub>4</sub> and N<sub>2</sub>O in the Yarlung Tsangpo River. *Chinese Journal of Ecology* **38**, 791-798 (2019).
- 37 Yan, W., Yang, L., Wang, F., Wang, J. & Ma, P. Riverine N<sub>2</sub>O concentrations, exports to estuary and emissions to atmosphere from the Changjiang River in response to increasing nitrogen loads. *Global Biogeochemical Cycles* **26**, doi:10.1029/2010gb003984 (2012).
- 38 Xia, X. *et al.* Nitrogen loss from a turbid river network based on N<sub>2</sub> and N<sub>2</sub>O fluxes: Importance of suspended sediment. *Science of The Total Environment* **757**, 143918, doi:10.1016/j.scitotenv.2020.143918 (2021).
- 39 Hao, X. *et al.* Greenhouse gas emissions from the water-air interface of a grassland river: a case study of the Xilin River. *Scientific Reports* **11**, 2659, doi:10.1038/s41598-021-81658-x (2021).
- 40 Outram, F. N. & Hiscock, K. M. Indirect nitrous oxide emissions from surface water bodies in a lowland arable catchment: A significant contribution to agricultural greenhouse gas budgets? *Environmental Science & Technology* **46**, 8156-8163, doi:10.1021/es3012244 (2012).
- 41 Cooper, R. J., Wexler, S. K., Adams, C. A. & Hiscock, K. M. Hydrogeological controls on regional-scale indirect nitrous oxide emission factors for rivers. *Environmental Science & Technology* **51**, 10440-10448, doi:10.1021/acs.est.7b02135 (2017).
- 42 Garnier, J. *et al.* Nitrous oxide (N<sub>2</sub>O) in the Seine river and basin: Observations and budgets. *Agriculture, Ecosystems & Environment* **133**, 223-233, doi:10.1016/j.agee.2009.04.024 (2009).
- 43 Marescaux, A., Thieu, V. & Garnier, J. Carbon dioxide, methane and nitrous oxide emissions from the human-impacted Seine watershed in France. *Science of The Total Environment* **643**, 247-259, doi:10.1016/j.scitotenv.2018.06.151 (2018).
- 44 Borges, A. V. *et al.* Effects of agricultural land use on fluvial carbon dioxide, methane and nitrous oxide concentrations in a large European river, the Meuse (Belgium). *Science of The Total Environment* **610-611**, 342-355, doi:10.1016/j.scitotenv.2017.08.047 (2018).
- 45 Rosamond, M. S., Thuss, S. J. & Schiff, S. L. Dependence of riverine nitrous oxide emissions on dissolved oxygen levels. *Nature Geoscience* **5**, 715-718, doi:10.1038/ngeo1556 (2012).
- 46 Baulch, H. M., Schiff, S. L., Maranger, R. & Dillon, P. J. Nitrogen enrichment and the emission of nitrous oxide from streams. *Global Biogeochemical Cycles* **25**, doi:10.1029/2011gb004047 (2011).
- 47 Baulch, H. M., Dillon, P. J., Maranger, R. & Schiff, S. L. Diffusive and ebullitive transport of methane and nitrous oxide from streams: Are bubble-mediated fluxes important? *Journal of Geophysical Research: Biogeosciences* **116**, n/a-n/a, doi:10.1029/2011JG001656 (2011).
- 48 Hinshaw, S. E. & Dahlgren, R. A. Dissolved nitrous oxide concentrations and fluxes from the eutrophic San Joaquin River, California. *Environmental Science & Technology* **47**, 1313-1322, doi:10.1021/es301373h (2013).
- 49 Davis, M. P. & David, M. B. Nitrous oxide fluxes from agricultural streams in east-central Illinois. *Water, Air, & Soil Pollution* **229**, 354, doi:10.1007/s11270-018-4007-7 (2018).
- 50 Cole, J. J. & Caraco, N. F. Emissions of nitrous oxide (N<sub>2</sub>O) from a tidal, freshwater river, the Hudson

- River, New York. *Environmental Science & Technology* **35**, 991-996, doi:10.1021/es0015848 (2001).
- 51 Beaulieu, J. J., Arango, C. P., Hamilton, S. K. & Tank, J. L. The production and emission of nitrous oxide from headwater streams in the Midwestern United States. *Global Change Biology* **14**, 878-894, doi:10.1111/j.1365-2486.2007.01485.x (2008).
- 52 Aho, K. S. *et al.* An intense precipitation event causes a temperate forested drainage network to shift from N<sub>2</sub>O source to sink. *Limnology and Oceanography* **n/a**, doi:10.1002/lno.12006.
- 53 Schade, J. D., Bailio, J. & McDowell, W. H. Greenhouse gas flux from headwater streams in New Hampshire, USA: Patterns and drivers. *Limnology and Oceanography* **61**, S165-S174, doi:10.1002/lno.10337 (2016).
- 54 Turner, P. A. *et al.* Regional-scale controls on dissolved nitrous oxide in the Upper Mississippi River. *Geophysical Research Letters* **43**, 4400-4407, doi:10.1002/2016gl068710 (2016).
- 55 Turner, P. A. *et al.* Indirect nitrous oxide emissions from streams within the US Corn Belt scale with stream order. *Proceedings of the National Academy of Sciences* **112**, 9839-9843, doi:10.1073/pnas.1503598112 (2015).
- 56 Beaulieu, J. J. *et al.* Nitrous oxide emission from denitrification in stream and river networks. *Proceedings of the National Academy of Sciences* **108**, 214-219, doi:10.1073/pnas.1011464108 (2011).
- 57 Andrews, L. F. *et al.* Hydrological, geochemical and land use drivers of greenhouse gas dynamics in eleven sub-tropical streams. *Aquatic Sciences* **83**, 40, doi:10.1007/s00027-021-00791-x (2021).
- 58 Clough, T. J., Bertram, J. E., Sherlock, R. R., Leonard, R. L. & Nowicki, B. L. Comparison of measured and EF<sub>5-r</sub>-derived N<sub>2</sub>O fluxes from a spring-fed river. *Global Change Biology* **12**, 352-363, doi:10.1111/j.1365-2486.2005.01089.x (2006).
- 59 Clough, T. J., Buckthought, L. E., Kelliher, F. M. & Sherlock, R. R. Diurnal fluctuations of dissolved nitrous oxide (N<sub>2</sub>O) concentrations and estimates of N<sub>2</sub>O emissions from a spring-fed river: implications for IPCC methodology. *Global Change Biology* **13**, 1016-1027, doi:10.1111/j.1365-2486.2007.01337.x (2007).
- 60 Clough, T. J., Buckthought, L. E., Casciotti, K. L., Kelliher, F. M. & Jones, P. K. Nitrous oxide dynamics in a braided river system, New Zealand. *Journal of Environmental Quality* **40**, 1532-1541, doi:10.2134/jeq2010.0527 (2011).
- 61 Audet, J., Wallin, M. B., Kyllmar, K., Andersson, S. & Bishop, K. Nitrous oxide emissions from streams in a Swedish agricultural catchment. *Agriculture, Ecosystems & Environment* **236**, 295-303, doi:10.1016/j.agee.2016.12.012 (2017).
- 62 Audet, J. *et al.* Forest streams are important sources for nitrous oxide emissions. *Global Change Biology* **26**, 629-641, doi:10.1111/gcb.14812 (2020).
- 63 Soued, C., del Giorgio, P. A. & Maranger, R. Nitrous oxide sinks and emissions in boreal aquatic networks in Québec. *Nature Geoscience* **9**, 116-120, doi:10.1038/ngeo2611 (2016).
- 64 Harms, T. K., Rocher-Ros, G. & Godsey, S. E. Emission of greenhouse gases from water tracks draining Arctic hillslopes. *Journal of Geophysical Research: Biogeosciences* **125**, e2020JG005889, doi:10.1029/2020JG005889 (2020).
- 65 Hu, M., Chen, D. & Dahlgren, R. A. Modeling nitrous oxide emission from rivers: A global assessment. *Global Change Biology* **22**, 3566-3582, doi:10.1111/gcb.13351 (2016).
- 66 Gardner, J. R., Fisher, T. R., Jordan, T. E. & Knee, K. L. Balancing watershed nitrogen budgets: accounting for biogenic gases in streams. *Biogeochemistry* **127**, 231-253, doi:10.1007/s10533-015-0177-1 (2016).

- 67 Dee, M. M. & Tank, J. L. Inundation time mediates denitrification end products and carbon limitation in constructed floodplains of an agricultural stream. *Biogeochemistry*, doi:10.1007/s10533-020-00670-x (2020).
- 68 Beaulieu, J. J., Arango, C. P. & Tank, J. L. The effects of season and agriculture on nitrous oxide production in headwater streams. *Journal of Environmental Quality* **38**, 637-646, doi:10.2134/jeq2008.0003 (2009).
- 69 Billen, G. *et al.* Modeling indirect N<sub>2</sub>O emissions along the N cascade from cropland soils to rivers. *Biogeochemistry* **148**, 207-221, doi:10.1007/s10533-020-00654-x (2020).
- 70 Dong, L. F., Nedwell, D. B. & Stott, A. Sources of nitrogen used for denitrification and nitrous oxide formation in sediments of the hypernutrified Colne, the nutrified Humber, and the oligotrophic Conwy estuaries, United Kingdom. *Limnology and Oceanography* **51**, 545-557, doi:10.4319/lo.2006.51.1\_part\_2.0545 (2006).
- 71 Huang, S., Chen, C., Yang, X., Wu, Q. & Zhang, R. Distribution of typical denitrifying functional genes and diversity of the *nirS*-encoding bacterial community related to environmental characteristics of river sediments. *Biogeosciences* **8**, 3041-3051, doi:10.5194/bg-8-3041-2011 (2011).
- 72 Zhang, M. *et al.* Response of chemical properties, microbial community structure and functional genes abundance to seasonal variations and human disturbance in Nanfei River sediments. *Ecotoxicology and Environmental Safety* **183**, 109601, doi:10.1016/j.ecoenv.2019.109601 (2019).
- 73 Thuan, N. C. *et al.* N<sub>2</sub>O production by denitrification in an urban river: evidence from isotopes, functional genes, and dissolved organic matter. *Limnology* **19**, 115-126, doi:10.1007/s10201-017-0524-0 (2018).
- 74 Ligi, T. *et al.* Effects of soil chemical characteristics and water regime on denitrification genes (*nirS*, *nirK*, and *nosZ*) abundances in a created riverine wetland complex. *Ecological Engineering* **72**, 47-55, doi:10.1016/j.ecoleng.2013.07.015 (2014).
- 75 Martínez-Santos, M. *et al.* Treated and untreated wastewater effluents alter river sediment bacterial communities involved in nitrogen and sulphur cycling. *Science of The Total Environment* **633**, 1051-1061, doi:10.1016/j.scitotenv.2018.03.229 (2018).
- 76 Mahamoud Ahmed, A., Lyautey, E., Bonninaeu, C., Dabrin, A. & Pesce, S. Environmental concentrations of copper, alone or in mixture with arsenic, can impact river sediment microbial community structure and functions. *Frontiers in Microbiology* **9**, doi:10.3389/fmicb.2018.01852 (2018).
- 77 Lyautey, E. *et al.* Abundance, activity and structure of denitrifier communities in phototrophic river biofilms (River Garonne, France). *Hydrobiologia* **716**, 177-187, doi:10.1007/s10750-013-1561-2 (2013).
- 78 Wit, F. *et al.* The impact of disturbed peatlands on river outgassing in Southeast Asia. *Nature Communications* **6**, 10155, doi:10.1038/ncomms10155 (2015).
- 79 Panneer Selvam, B., Natchimuthu, S., Arunachalam, L. & Bastviken, D. Methane and carbon dioxide emissions from inland waters in India – implications for large scale greenhouse gas balances. *Global Change Biology* **20**, 3397-3407, doi:10.1111/gcb.12575 (2014).
- 80 Yu, Z. *et al.* Carbon dioxide and methane dynamics in a human-dominated lowland coastal river network (Shanghai, China). *Journal of Geophysical Research: Biogeosciences* **122**, 1738-1758, doi:10.1002/2017jg003798 (2017).
- 81 Wang, G. *et al.* Intense methane ebullition from urban inland waters and its significant contribution to greenhouse gas emissions. *Water Research* **189**, 116654, doi:10.1016/j.watres.2020.116654 (2021).

- 82 Wallin, M. B. *et al.* Carbon dioxide and methane emissions of Swedish low-order streams—A national estimate and lessons learnt from more than a decade of observations. *Limnology and Oceanography Letters* **3**, 156-167, doi:10.1002/lol2.10061 (2018).
- 83 Hutchins, R. H. S., Casas-Ruiz, J. P., Prairie, Y. T. & del Giorgio, P. A. Magnitude and drivers of integrated fluvial network greenhouse gas emissions across the boreal landscape in Québec. *Water Research* **173**, 115556, doi:10.1016/j.watres.2020.115556 (2020).
- 84 Zhang, L. *et al.* Significant methane ebullition from alpine permafrost rivers on the East Qinghai-Tibet Plateau. *Nature Geoscience* **13**, 349-354, doi:10.1038/s41561-020-0571-8 (2020).
